# Supplementary material for: Myeloid cell nuclear differentiation antigen controls the pathogen-stimulated type I interferon cascade in human monocytes by transcriptional regulation of IRF7
Source: PubMed Central journal article supplement (PMC8748983; doi:10.1038/s41467-021-27701-x), 2022-01-10
Supplement: 41467_2021_27701_MOESM1_ESM.pdf [file 41467_2021_27701_MOESM1_ESM.pdf]

## Supplementary information

### **Myeloid cell nuclear differentiation antigen controls the pathogen-stimulated type I interferon cascade in human monocytes by transcriptional regulation of IRF7**

Lili Gu<sup>1,6</sup>, David Casserly<sup>1,6</sup>, Gareth Brady<sup>2</sup>, Susan Carpenter<sup>3</sup>, Adrian P. Bracken<sup>4</sup>, Katherine A Fitzgerald<sup>3</sup>, Leonie Unterholzner<sup>1,5</sup> and Andrew G Bowie<sup>1,7\*</sup>

<sup>1</sup>School of Biochemistry and Immunology, Trinity Biomedical Sciences Institute and <sup>2</sup>School of Medicine, Trinity College Dublin, Dublin 2, Ireland. <sup>3</sup>Division of Infectious Diseases and Immunology, University of Massachusetts Medical School, Worcester, Massachusetts, USA. <sup>4</sup>Smurfit Institute of Genetics, Trinity College Dublin, Dublin 2, Ireland. <sup>5</sup>Current address: Division of Biomedical and Life Sciences, Faculty of Health and Medicine, Lancaster University, Lancaster LA1 4YQ, UK.

<sup>6</sup>These authors contributed equally

<sup>7</sup>Lead Contact

\*Correspondence: [agbowie@tcd.ie](mailto:agbowie@tcd.ie)

**Supplementary Table 1:** List of primers used for quantitative RT-PCR

| <b>Target</b>             | <b>Sequence (5'---3')</b>  |
|---------------------------|----------------------------|
| $\beta$ -actin (forward)  | CGCGAGAGAAGATGACCCAGATC    |
| $\beta$ -actin (reverse)  | GCCAGAGGCGTACAGGGATA       |
| MNDA (forward)            | TACTCCGAATCAGGAAACCCAGGCC  |
| MNDA (reverse)            | TGGCGCTGTTGCTTTCAGTACCAA   |
| IFI16 (forward)           | CCGTTTCATGACCAGCATAGG      |
| IFI16 (reverse)           | TCAGTCTTGGTTTCAACGTGGT     |
| AIM2 (forward)            | TGGGCATGCTCTCCTGAGTCCTC    |
| AIM2 (reverse)            | TGACAACCTTTGGGATCAGCCTCCTG |
| PYHIN1 (forward)          | TCACCAAGAAGGATGAAACCC      |
| PYHIN1 (reverse)          | CGGTTGGTGGGAAGTGTCAGA      |
| IFN $\beta$ (forward)     | CTGCATTACCTGAAGGCCAAG      |
| IFN $\beta$ (reverse)     | TTGAAGCAATTGTCCAGTCCC      |
| IFN $\alpha$ (forward)*   | TGAAGGACAGACATGACTTTGG     |
| IFN $\alpha$ (reverse)*   | TCCTTTGTCCTGAAGAGATTGA     |
| IFN $\alpha$ 14 (forward) | TGAATTTCCCCAGGAGGAA        |
| IFN $\alpha$ 14 (reverse) | TCCCAAGCAGCAGATGAGTT       |
| IRF7 (forward)            | AGCGGCTGCTATGAGGGGCT       |
| IRF7 (reverse)            | GCCACAGCCCAGGCCTTGAA       |
| IFIT1 (forward)           | CACCATTGGCTGCTGTTTAGCTCC   |
| IFIT1 (reverse)           | GGCAGCCGTTCTGCAGGGTTTT     |
| IFIT2 (forward)           | TTCTCCCTCCATCAAGTTCCAG     |
| IFIT2 (reverse)           | GCACTGCAACCATGAGTGAGAA     |
| IRF1 (forward)            | AGGCCAAGAGGAAGTCATGTG      |
| IRF1 (reverse)            | CTGTGTAGCTGCTGTGGTCA       |
| ISG15 (forward)           | TTTGCCAGTACAGGAGCTTGTG     |

|                            |                       |
|----------------------------|-----------------------|
| ISG15 (reverse)            | GGGTGATCTGCGCCTTCA    |
| IRF3 (forward)             | CTGGGGCCCTTCATTGTAGA  |
| IRF3 (reverse)             | GCACAACCTTGACCATCACG  |
| IRF5 (forward)             | AAGCCATCCGGCCAA       |
| IRF5 (reverse)             | GGAAGTCCCGGCTCTTGTTAA |
| IFN $\lambda$ -1 (forward) | CTGCCACATTGGCAGGTTCA  |
| IFN $\lambda$ -1 (reverse) | AGACAGGAGAGCTGCAACTC  |
| IFN $\lambda$ -2 (forward) | AGTCGCTTCTGCTGAAGGAC  |
| IFN $\lambda$ -2 (reverse) | TCCAGAACCTTCAGCGTCAG  |

\*IFN $\alpha$  primers were designed to target transcripts for IFN $\alpha$ 2, IFN $\alpha$ 5 and IFN $\alpha$ 21.

**Supplementary Table 2:** List of primers used for chromatin immunoprecipitation

| <b>Target</b>                  | <b>Sequence (5'---3')</b> |
|--------------------------------|---------------------------|
| IFN $\alpha$ 14 ChIP (forward) | AAGCCCATGGGGCAGGGAA       |
| IFN $\alpha$ 14 ChIP (reverse) | GGGCTGGTTGATGAGGGGT       |
| IFN $\beta$ ChIP (forward)     | TAGTCATTCACTGAAACTTTA     |
| IFN $\beta$ ChIP (reverse)     | AGGTTGCAGTTAGAATGTC       |
| IRF7 ChIP (forward)            | ATCTTGCGCCAAGACAATTCAGGG  |
| IRF7 ChIP (reverse)            | TTGTGGCACTGCTCACCAGTAGAT  |
| IRF7 promoter -1000 (forward)  | ACCCTACACAGAGATTGCCT      |
| IRF7 promoter -865 (reverse)   | CTCCAACCCAAGCATGTAGATT    |
| IRF7 promoter -900(forward)    | TAGTCCCCTTCTGAAATCTACATG  |
| IRF7 promoter -767 (reverse)   | CCTAGGCCTCCTGGTCT         |
| IRF7 promoter -800 (forward)   | GCCTGAGCAGGAGCCA          |
| IRF7 promoter -660 (reverse)   | TTAGGGAAAGTGCTGACAAGCC    |
| IRF7 promoter -700 (forward)   | CATCAAGGGATCCCTTGCG       |

|                              |                          |
|------------------------------|--------------------------|
| IRF7 promoter -538 (reverse) | GCTGGGATTTAGGCGAGAG      |
| IRF7 promoter -600 (forward) | CGGGAGGCTTAGGTAGGA       |
| IRF7 promoter -440 (reverse) | GTGGACGTGCCTCGAAA        |
| IRF7 promoter -500 (forward) | GGAGTTCGACACCAGCC        |
| IRF7 promoter -384 (reverse) | CTACCTAAGCCTCCCGAGTA     |
| IRF7 promoter -300 (forward) | CTCCATCTCAAAAAAAGAAACGC  |
| IRF7 promoter -189 (reverse) | GGGACAGAGCAAGACTCAG      |
| IRF7 promoter -200 (forward) | TGCTCTGTCCCCTGGGCT       |
| IRF7 promoter -83 (reverse)  | ATGCGACCAGCGGAACC        |
| IRF7 promoter -100 (forward) | GGTTCCGCTGGTTCGCAT       |
| IRF7 promoter +20 (reverse)  | GGACGGGAAGTTTCGTCTCG     |
| IRF7 promoter 0 (forward)    | CGAGACGAAACTTCCCGT       |
| IRF7 promoter +132 (reverse) | CCCAGCTCTTGGCTCTAC       |
| IRF7 promoter +200 (forward) | AACCGGACGGGGTGGGAT       |
| IRF7 promoter +353 (reverse) | CAGGTGTTGAACCAGTGTCCAG   |
| IRF7 promoter +350 (forward) | AACCGGACGGGGTGGGAT       |
| IRF7 promoter +488(reverse)  | CAGGTGTTGAACCAGTGTCCAG   |
| IRF7 promoter +450 (forward) | CCCTCTGCCAAGAGATCCATA    |
| IRF7 promoter +570 (reverse) | GGAGGTAAGGGCTCCTGT       |
| IRF7 promoter +570 (forward) | ACAGGAGCCCTTACCTCC       |
| IRF7 promoter +671 (reverse) | TGGCATCTGGAGAGGGT        |
| EIF4A2 Promoter (forward)    | TGGTGTCATCGAGAGCAACTG    |
| EIF4A2 Promoter (reverse)    | GGCTTCTCAAACCGTAAGCA     |
| SAT2 promoter (forward)      | CATCGAATGGAAATGAAAGGAGTC |
| SAT2 promoter (reverse)      | ACCATTGGATGATTGCAGTCAA   |
| IRF1 promoter (forward)      | CTCCATCTCAAAAAAAGAAACGC  |
| IRF1 promoter (reverse)      | GGGACAGAGCAAGACTCAG      |

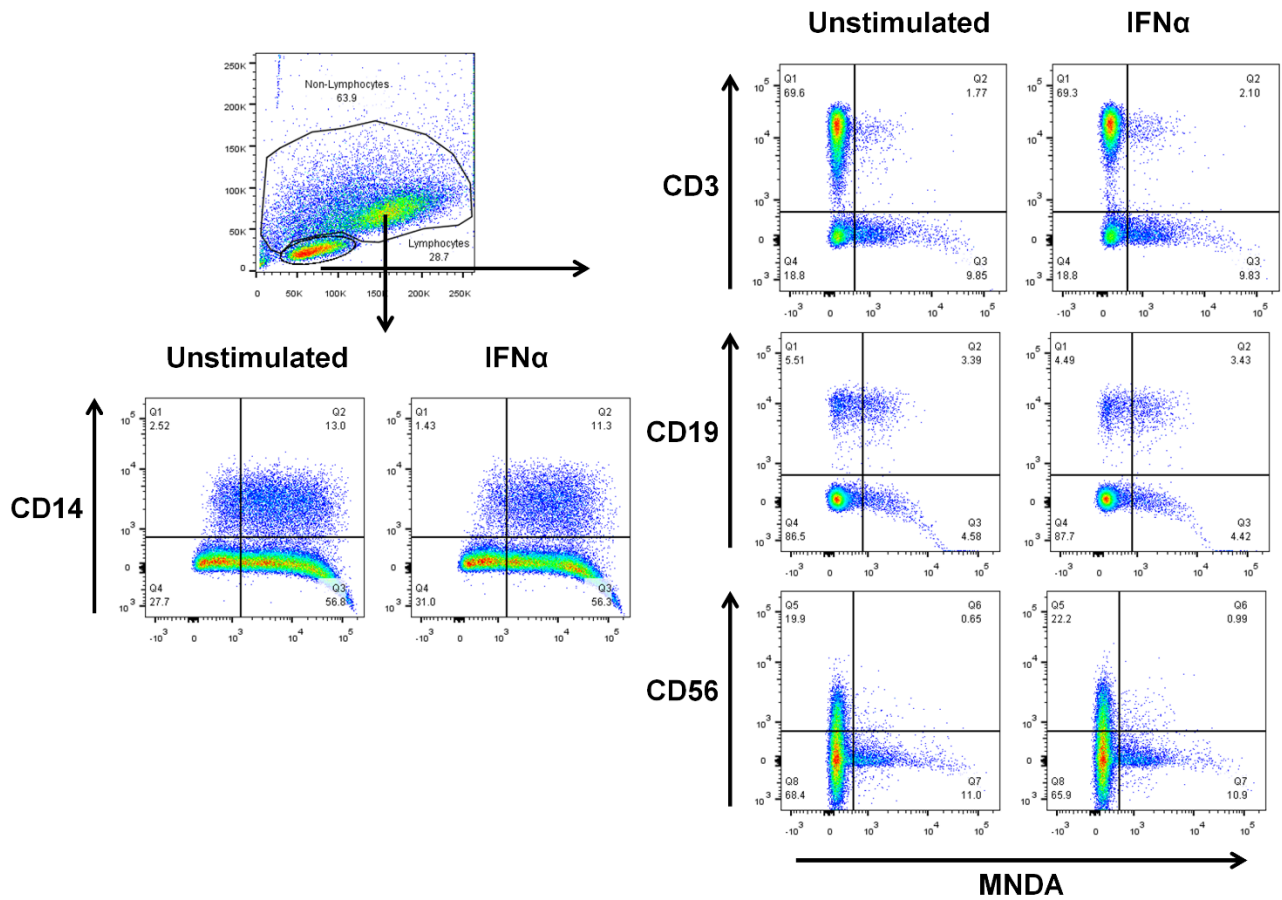

**Supplementary Figure 1. MNDa is expressed in monocytes and B cells in PBMC sub-populations.** Human peripheral blood mononuclear cells (PBMCs) isolated from buffy coats were stimulated with 1000 u/ml of IFN $\alpha$  for 16 h and prior to staining with the indicated antibodies. Cells were gated on lymphocytes for the lymphoid markers CD3 (for T cells), CD19 (for B cells) and CD56 (for NK cells), and the non-lymphocyte cells were gated for the myeloid marker CD14 (for monocytes). Plots show that MNDa is primarily expressed in CD14 $^+$  monocytes and CD19 $^+$  B cells. Representative of three independent experiments.

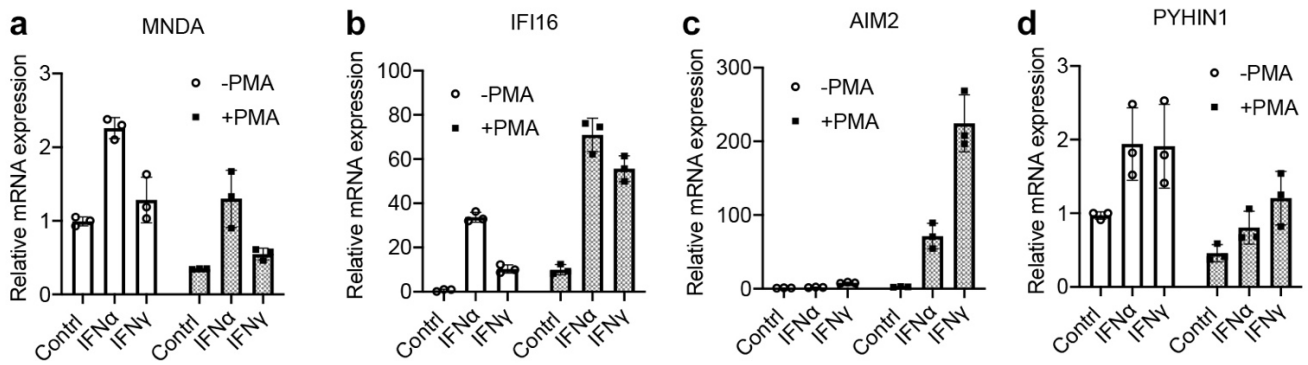

**Supplementary Figure 2. Expression of MND A and other PYHIN proteins in THP-1 cells.** (a-d) Quantitative PCR analysis of mRNA expression of MND A (a), IFI16 (b), AIM2 (c) or PYHIN1 (d) in unprimed (-PMA) or PMA primed (+PMA) THP-1 cells treated with IFN $\alpha$  (1000 U/ml) or IFN $\gamma$  (50 ng/ml) for 6 h. Data are mean  $\pm$  SD of triplicate samples and are representative of three independent experiments.

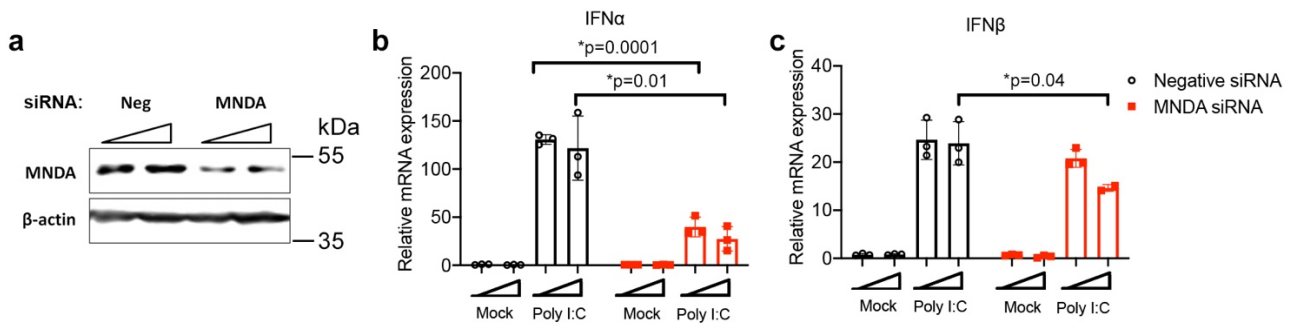

**Supplementary Figure 3. MNDA siRNA suppresses RNA-stimulated type I IFN induction** (a) Immunoblot analysis of MNDA protein expression in THP-1 cells electroporated with 50 and 100pmol (wedges) of negative control siRNA or MNDA siRNA for 48 h. Representative of three experiments. (b, c) Quantitative PCR analysis of mRNA expression of IFN $\alpha$  (b) or IFN $\beta$  (c) from THP-1 cells electroporated with 50 and 100 pmol (wedges) of negative control siRNA or MNDA siRNA for 24 h, prior to transfection with poly(I:C) for a further 24 h. Data are mean  $\pm$  SD of triplicate samples and are representative of three independent experiments; two tailed unpaired Students *t*-test; \* $p$ <0.05 indicates significance compared to respective groups.

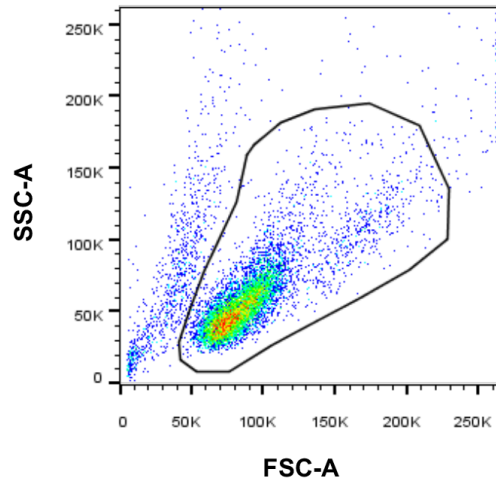

**Supplementary Figure 4. Gating strategy for detection of VSV-GFP in THP-1 cells.** Flow cytometry analysis showing gating strategy for the sorting of GFP-positive cells, using THP-1 cells stably expressing control shRNA and infected with VSV-GFP. Related to Fig. 2e.



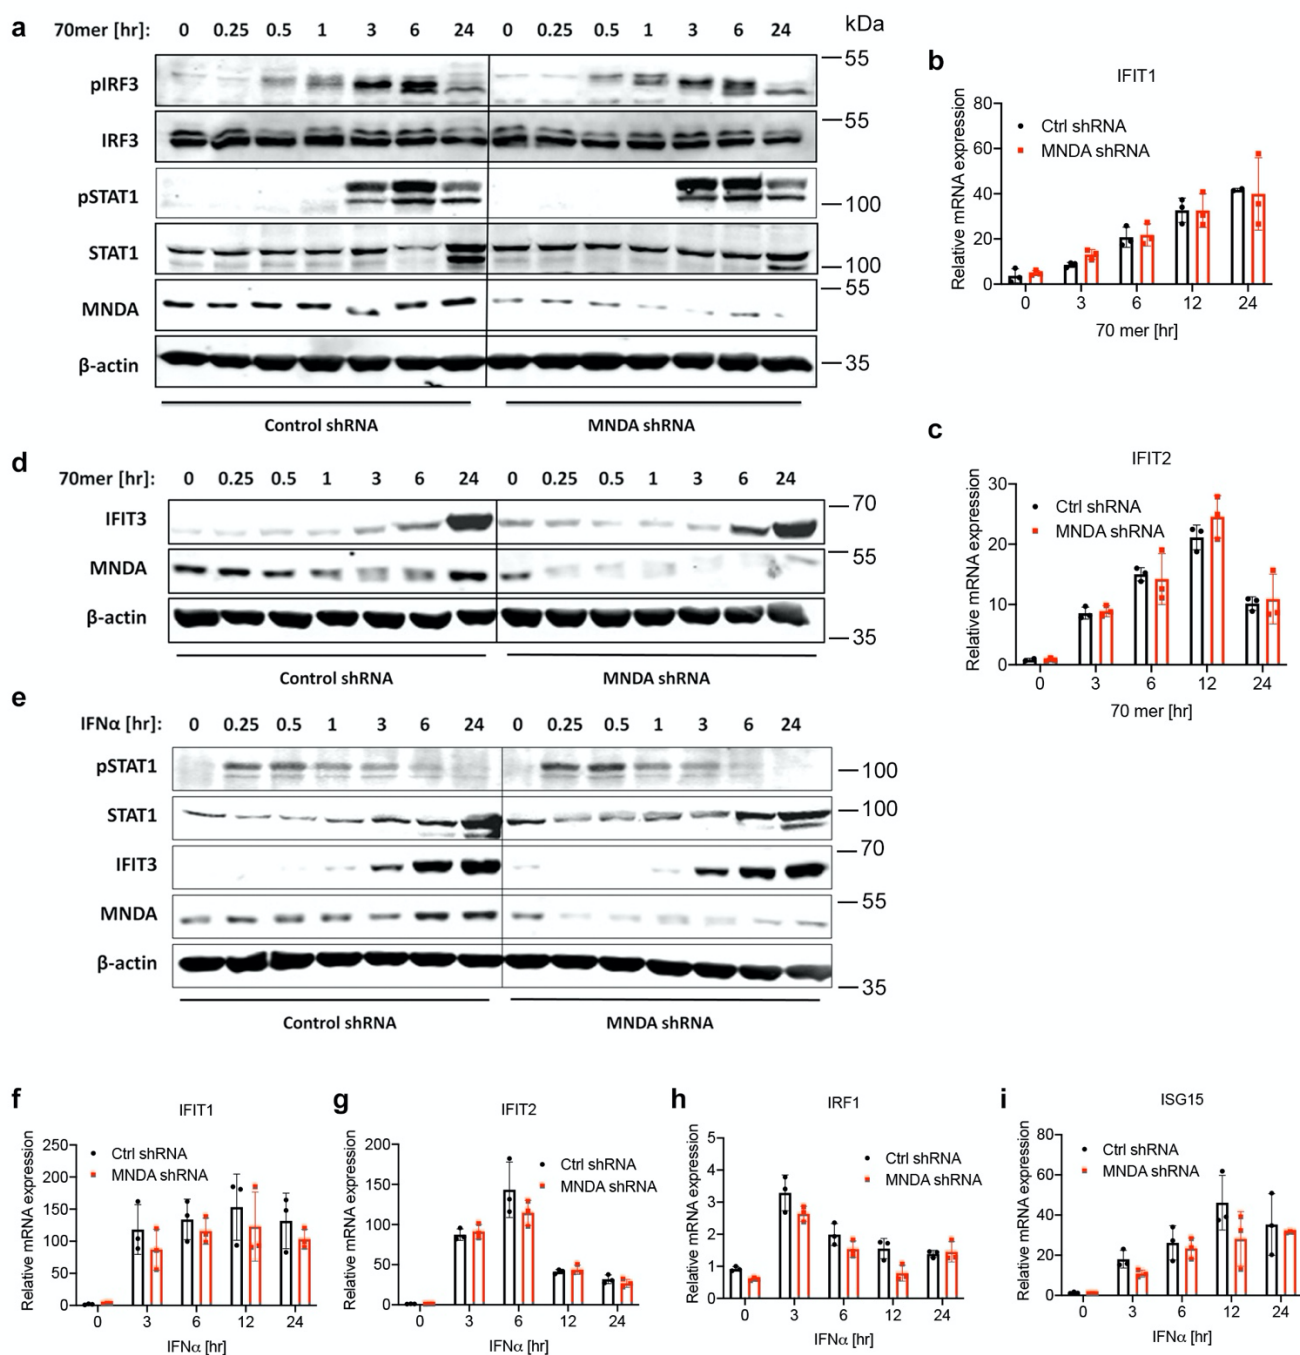

**Supplementary Figure 5. Normal activation of PRR and IFNAR signalling in cells with reduced MNDA expression.** (a) THP-1 cells expressing control or MNDA shRNA were transfected with dsVACV 70mer (1  $\mu$ g/ml) for the indicated times and cell lysates prepared and immunoblotted for the indicated proteins. (b, c) Quantitative PCR analysis of mRNA expression of IFIT1 (b) or IFIT2 (c) from THP-1 cells expressing control or MNDA shRNA and transfected with dsVACV 70mer (1  $\mu$ g/ml) for the indicated times. (d) Cell were treated as in (a) and the indicated proteins detected by immunoblot. (e) THP-1 cells expressing ctrl shRNA or MNDA shRNA were stimulated with IFN $\alpha$  (1000 U/ml) for the indicated times and cell lysates prepared and immunoblotted for the indicated proteins. (f-i) Quantitative PCR analysis of mRNA expression of IFIT1 (f), IFIT2 (g), IRF1 (h) or ISG15 (i) from THP-1 cells expressing control or MNDA shRNA and stimulated with IFN $\alpha$  (1000 U/ml) for the indicated times. All data are mean  $\pm$  SD of triplicate samples and are representative of three independent experiments. Immunoblots (a, d, e) are representative of three experiments.

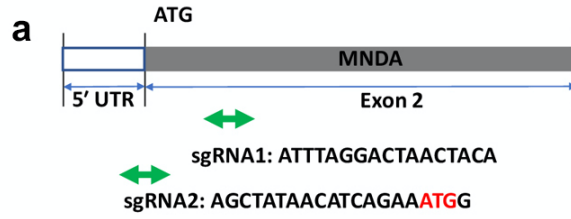

**b MNDA KO clone 1: sgRNA1**

CLUSTAL O(1.2.4) multiple sequence alignment

```

Sequence 1 (34%) ATTTTGGCTGGGACACTCACTCACAAAAGCATATCTCATTTTTAAAAATGCTGCATA 60
Sequence 2 (28%) ATTTTGGCTGGGACACTCACTCACAAAAGCATATCTCATTTTTAAAAATGCTGCATA 60
Sequence 3 (22%) ATTTTGGCTGGGACACTCACTCACAAAAGCATATCTCATTTTTAAAAATGCTGCATA 60
Reference       ATTTTGGCTGGGACACTCACTCACAAAAGCATATCTCATTTTTAAAAATGCTGCATA 60
*****
                                ATG
AATGTGTAATGTTGTGTGCTATTTTACTTTATAGGCCAAGCTATAACATCAGAAATGGT 120
AATGTGTAATGTTGTGTGCTATTTTACTTTATAGGCCAAGCTATAACATCAGAAATGGT 120
AATGTGTAATGTTGTGTGCTATTTTACTTTATAGGCCAAGCTATAACATCAGAAATGGT 120
AATGTGTAATGTTGTGTGCTATTTTACTTTATAGGCCAAGCTATAACATCAGAAATGGT 120
*****
GAATGAATACAAGAAAATCTTTTGTGAAAGGATTTGAGCTCATGGATGATTATCATT 180
GAATGAATACAAGAAAATCTTTTGTGAAAGGATTTGAGCTCATGGATGATTATCATT 180
GAATGAATACAAGAAAATCTTTTGTGAAAGGATTTGAGCTCATGGATGATTATCATT 180
GAATGAATACAAGAAAATCTTTTGTGAAAGGATTTGAGCTCATGGATGATTATCATT 180
*****
TACAT-----CTACAAAAATGCAAGAGGA 204
TACATCAATTAAGTCCTTACTG6CC-----TAAGTACAAAAATGCAAGAGGA 227
TACATCAATTAAGTCCTTACTG6CCATGATTTAGGACTAACTACAAAAATGCAAGAGGA 240
TACATCAATTAAGTCCTTACTG6CCATGATTTAGGACTAACTACAAAAATGCAAGAGGA 240
*****
ATACAACAGAAATTAAGATTACAGATTTGATGGAAAAAAGTTCCAAGGCGTTGCCTGTCT 264
ATACAACAGAAATTAAGATTACAGATTTGATGGAAAAAAGTTCCAAGGCGTTGCCTGTCT 287
ATACAACAGAAATTAAGATTACAGATTTGATGGAAAAAAGTTCCAAGGCGTTGCCTGTCT 300
ATACAACAGAAATTAAGATTACAGATTTGATGGAAAAAAGTTCCAAGGCGTTGCCTGTCT 300
*****

```

**d MNDA KO clone 2&3: sgRNA2**

CLUSTAL O(1.2.4) multiple sequence alignment

```

Reference      TCTTATACGCATCCAAGGACAACATTTTGGCTGGGACACTCACTCACAAAAGCATATCT 60
Sequence 1 (99%) -----ATTTTGGCTGGGACACTCACTCACAAAAGCATATCT 37
*****
CATTTTTTAAAAATGCTGCATAAATGTGTAATGTTGTGTGCTATTTTACTTTATAGGC 120
CATTTTTTAAAAATGCTGCATAAATGTGTAATGTTGTGTGCTATTTTACTTTATAGGC 97
*****
CAAGCTATAACATCAGAAATGGTGAATGAATACAAGAAAATCTTTTGTGAAAGGATTT 180
-----CATCAGAAATGGTGAATGAATACAAGAAAATCTTTTGTGAAAGGATTT 147
*****
GAGCTCATGGATGATTATCATTTTACATCAATTAAGTCCTTACTTGGCCTATGATTAGG 239
GAGCTCATGGATGATTATCATTTTACATCAATTAAGTCCTTACTTGGCCTATGATTAGG 207
*****
ACTAACTACAAAAATGCAAGAGGAATACAACAGAAATTAAGATTACAGATTTGATGGAAA 299
ACTAACTACAAAAATGCAAGAGGAATACAACAGAAATTAAGATTACAGATTTGATGGAAA 267
*****
AAAGTCCAAGGCGTTGCTGTCTAGACAAACTAATAGAATTTGCCAAAGATATGCCATC 359
AAAGTCCAAGGCGTTGCTGTCTAGACAAACTAATAGAA----- 307
*****
AC      361
--      307

```

**c**

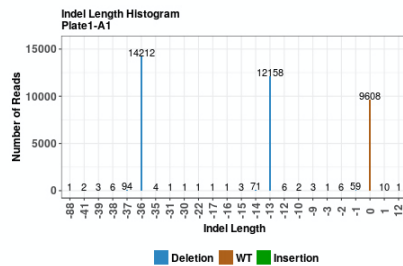

**e**

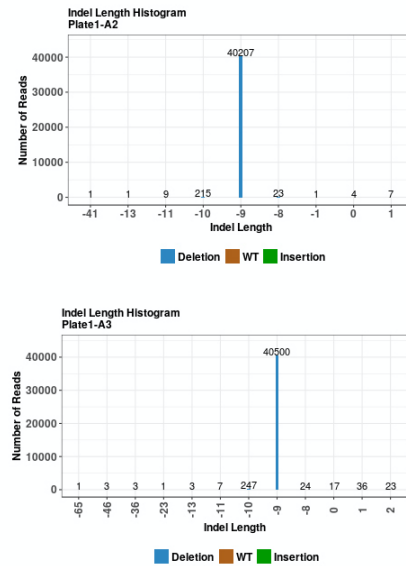

**Supplementary Figure 6. Genetic ablation of MNDA expression in THP-1 cells.** (a) Schematic diagram of human MNDA-specific sgRNA1 and sgRNA2 used in CRISPR/Cas9 gene editing of *MNDA* locus. (b, d) Sequence alignment of MNDA locus in *MNDA*<sup>-/-</sup> clones 1-3. (c, e) Indel length histograms from next generation sequences (NGS) analysis shows disruption of MNDA alleles in *MNDA*<sup>-/-</sup> clones 1 (c) or 2 (e, upper panel) and 3 (e, lower panel).

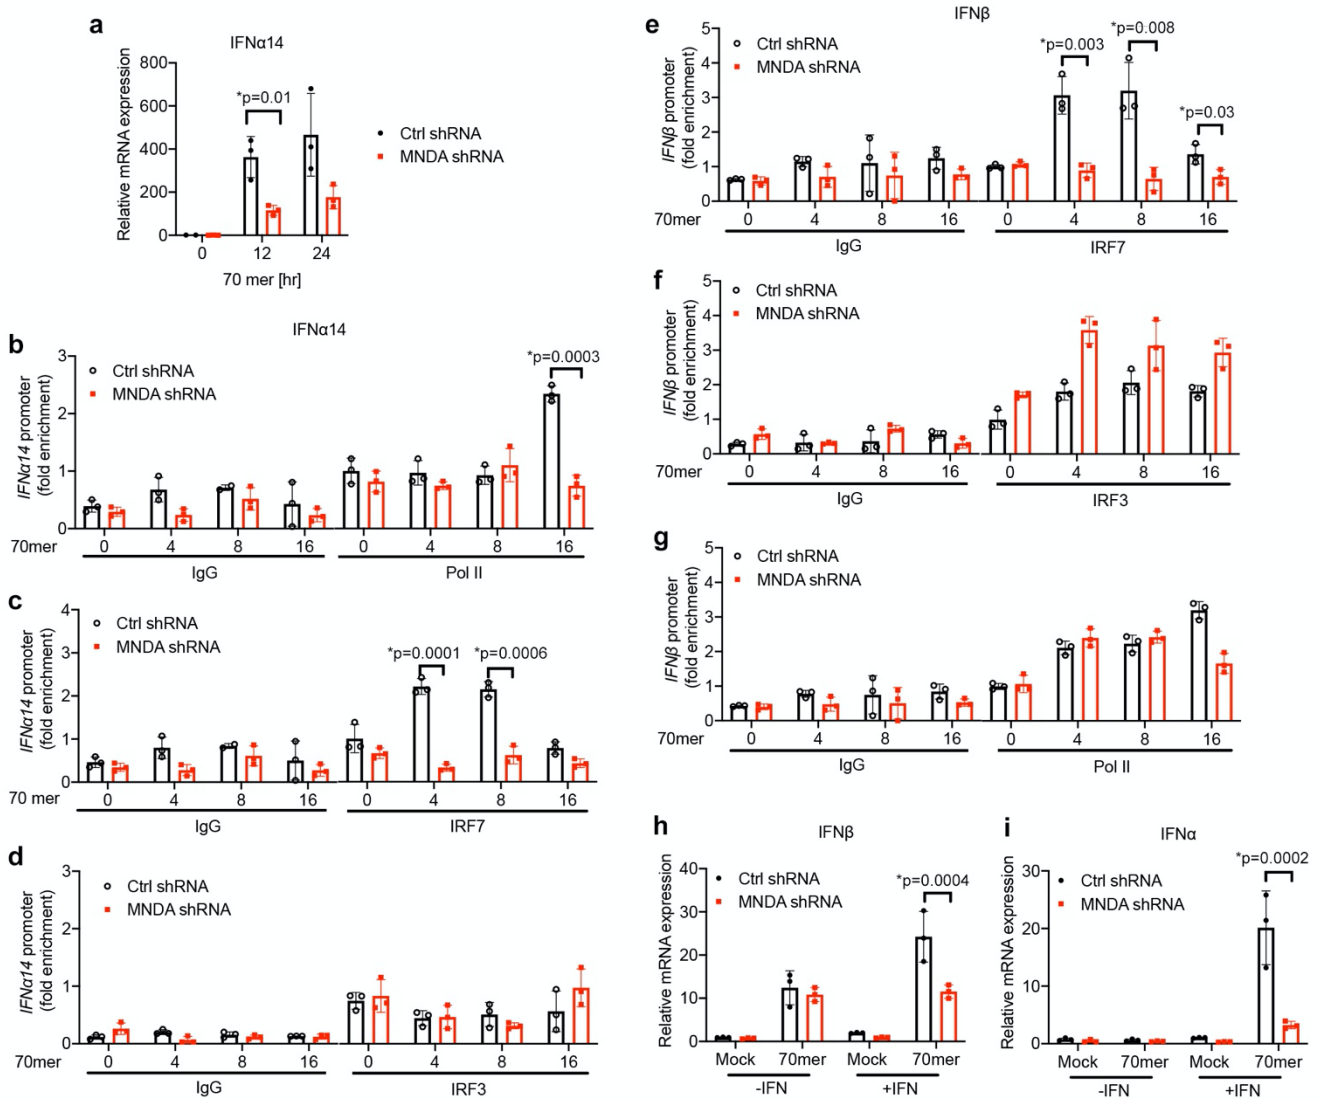

### Supplementary Figure 7. Regulation of IRF7-dependent type I IFN promoter induction by MNDA.

(a) Quantitative PCR analysis of IFN $\alpha$ 14 mRNA in THP-1 cells expressing control or MNDA shRNA and transfected with dsVACV 70mer (1  $\mu$ g/ml) for the indicated times. (b-d) Chromatin immunoprecipitation (ChIP) analysis of the recruitment of RNA Pol II (b), IRF7 (c) and IRF3 (d) to the IFN $\alpha$ 14 promoter in THP-1 cells stably expressing control or MNDA shRNA and transfected with dsVACV 70mer (1  $\mu$ g/ml) for the indicated times. Sheared chromatin lysates were subjected to ChIP with isotype control (IgG), and anti-RNA Pol II (b), anti-IRF7 (c), or anti-IRF3 (d) antibodies. (e-g) Chromatin immunoprecipitation (ChIP) analysis of the recruitment of IRF7 (e), IRF3 (f) and RNA Pol II (g) to the IFN $\beta$  promoter in THP-1 cells stably expressing control or MNDA shRNA, and transfected with dsVACV 70mer (1  $\mu$ g/ml) for the indicated times. Sheared chromatin lysates were subjected to ChIP with isotype control (IgG), and anti-IRF7 (e), anti-IRF3 (f) or anti-RNA Pol II (g) antibodies. (h, i) Quantitative PCR analysis of IFN $\beta$  (h) IFN $\alpha$  (i) mRNA from THP-1 cells expressing control or MNDA shRNA, either left untreated or primed with IFN $\alpha$  for 16 h, before mock transfection or transfection with dsVACV 70mer (1  $\mu$ g/ml) for a further 6 h. Data are mean  $\pm$  SD of triplicate samples (a, h-k) or PCR technical triplicates (b-g) and are representative of three independent experiments; two tailed unpaired Students *t*-test; \**p*<0.05 indicates significance compared to respective groups.

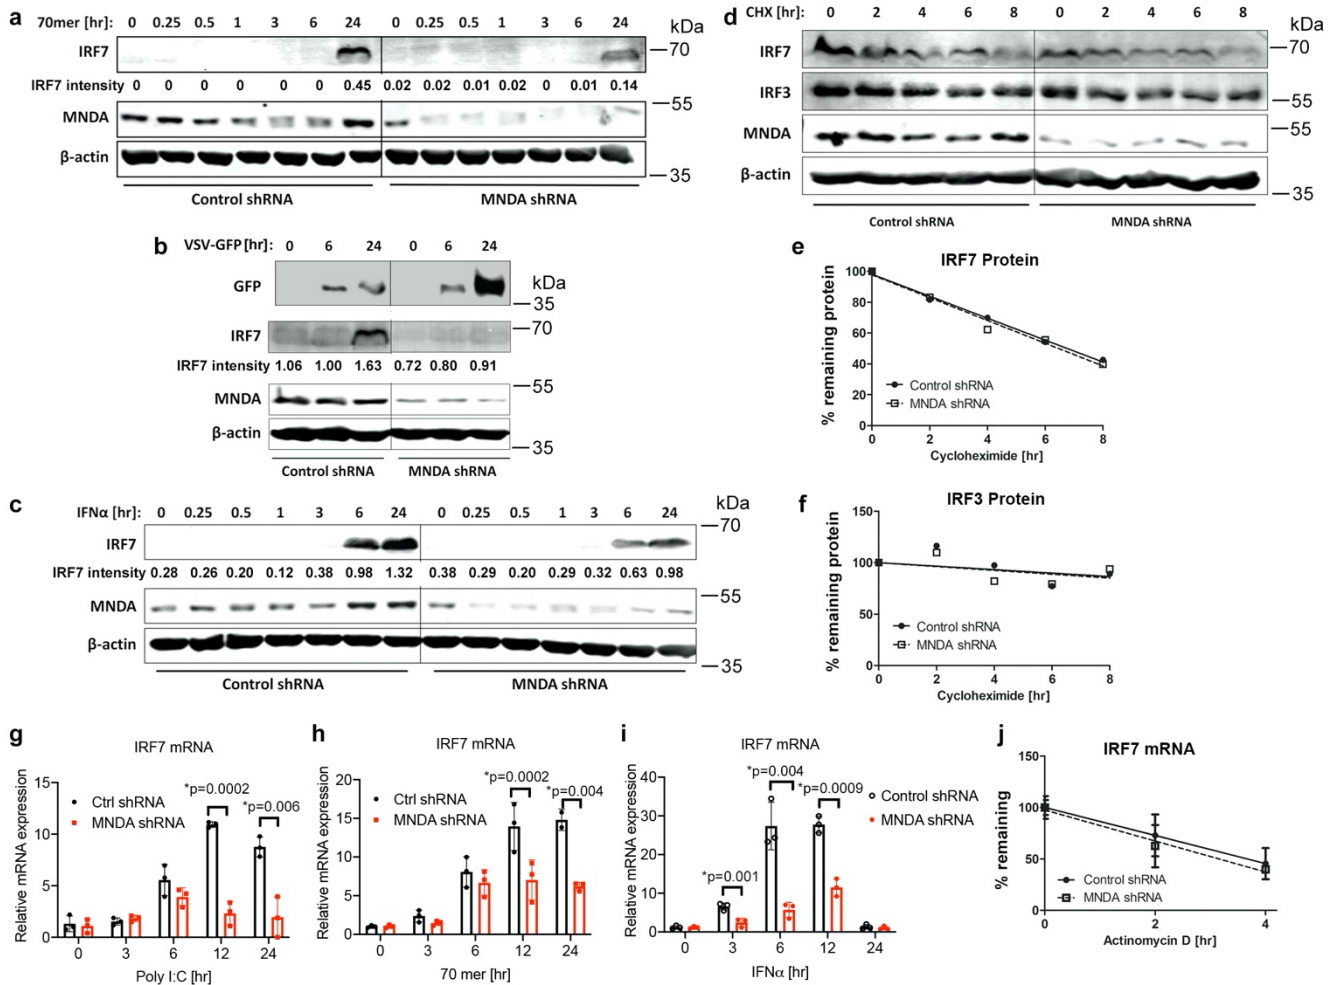

**Supplementary Figure 8. MNDA-dependent upregulation of IRF7 protein is not due to regulation of stability of IRF7 protein or mRNA.** (a) Immunoblot analysis of IRF7 and MNDA protein expression in THP-1 cells expressing control or MNDA shRNA transfected with dsVACV 70mer (1  $\mu$ g/ml) for the indicated times. (b) Immunoblot analysis of GFP, IRF7 and MNDA protein expression in THP-1 cells expressing control or MNDA shRNA infected with VSV-GFP (MOI of 1) for the indicated times. (c) Immunoblot analysis of IRF7 and MNDA protein expression in THP-1 cells expressing control or MNDA shRNA treated with IFN $\alpha$  (1000 U/ml) for the indicated times. Numbers below IRF7 lanes (IRF7 intensity) are arbitrary units representing IRF7 band intensities, calculated relative to  $\beta$ -actin using ImageJ densitometric analysis. Representative of three experiments (a-c). (d-f) THP-1 cells stably expressing control or MNDA shRNA were treated with IFN $\alpha$  (1000 U/ml) for 16 h. Cells were further treated with 25 $\mu$ g/ml cycloheximide (CHX) for the indicated times. Lysates were prepared and immunoblotted for the indicated proteins (d) and IRF7 (e) and IRF3 (f) band intensities, relative to  $\beta$ -actin, were quantified by densitometry and expressed as a percentage of protein present in the absence of CHX. Representative of three experiments. (g-i) Quantitative PCR analysis of IRF7 mRNA from THP-1 cells expressing control or MNDA shRNA and transfected with poly(I:C) (2.5  $\mu$ g/ml, g) or dsVACV 70mer (1  $\mu$ g/ml, h) or treated with IFN $\alpha$  (1000 U/ml, i) for the indicated times. (j) Analysis of IRF7 mRNA stability. Quantitative PCR analysis of IRF7 mRNA from THP-1 cells expressing control or MNDA shRNA and treated with IFN $\alpha$  (1000 U/ml) for 16 h prior to treatment with actinomycin D (1  $\mu$ g/ml) for the indicated times. Data are mean  $\pm$  SD of triplicate samples (g-j) and are representative of three independent experiments; two tailed unpaired Students *t*-test; \**p*<0.05 indicates significance compared to respective groups.

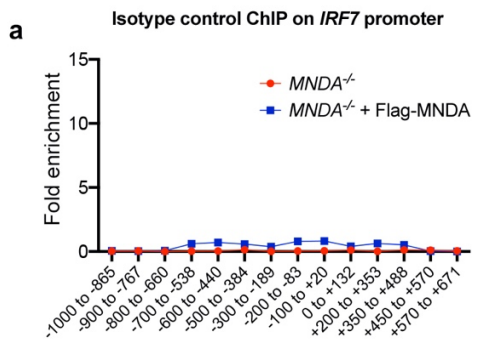

**b** Isotype control ChIP on *IRF7* promoter (-500 to -384)

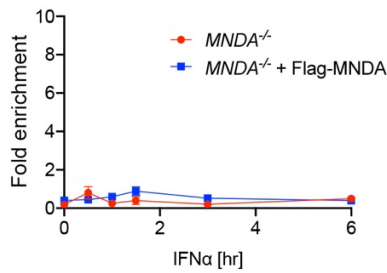

**c** Isotype control ChIP on *IRF1* promoter

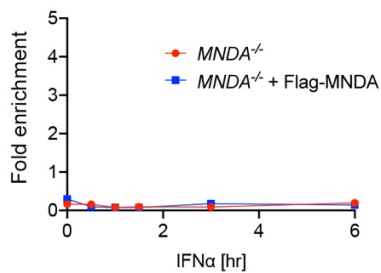

**Supplementary Figure 9. Isotype controls for ChIP experiments in Figures 6 and 7.** (a) Isotype control (IgG) for ChIP of the *IRF7* promoter between the region of nucleotides -1000 to +671, using primer sets to amplify the specific regions indicated, in *MNDA*<sup>-/-</sup> cells expressing empty lentiviral vector or vector encoding Flag-MNDA. Cells were stimulated with IFN $\alpha$  (1000 U/ml) for 1 hr. (b, c) Isotype control (IgG) for ChIP of -500 to -384 region of the *IRF7* promoter (b) or the *IRF1* promoter (c) in *MNDA*<sup>-/-</sup> cells expressing empty lentiviral vector or vector encoding Flag-MNDA. Cells were treated with IFN $\alpha$  (1000 U/ml) for the indicated times. Data are presented as mean  $\pm$  SEM of three independent experiments, each done with technical duplicates.

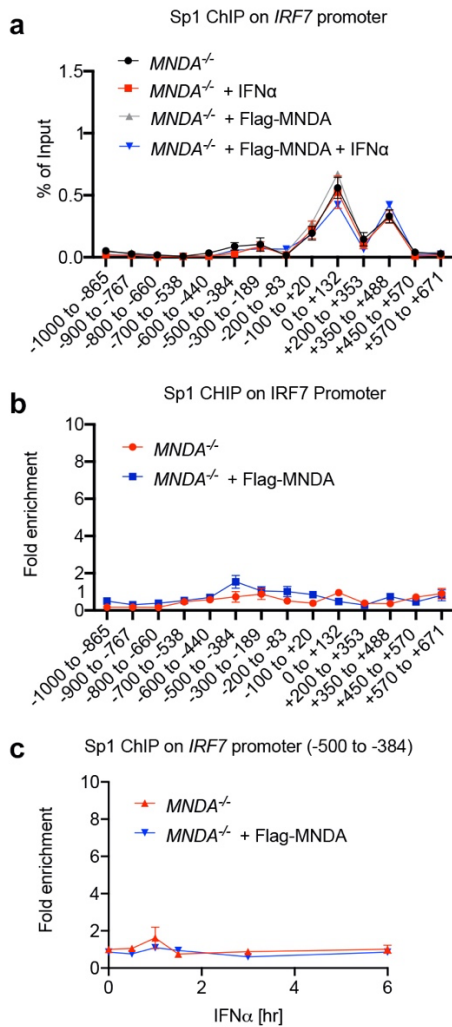

**Supplementary Figure 10. No role for Sp1 in MNDA-dependent regulation of the IRF7 promoter.** (a, b) ChIP analysis of Sp1 on the IRF7 promoter between the region of nucleotides -1000 to +671, using primer sets to amplify the specific regions indicated, in  $MNDA^{-/-}$  cells expressing empty lentiviral vector or vector encoding Flag-MNDA. Cells were stimulated with IFN $\alpha$  (1000 U/ml) for 1 hr. Data is shown as both percent of input (a) and fold change compared to non-stimulated cells (b). (c) Sp1 ChIP of -500 to -384 region of the IRF7 promoter in  $MNDA^{-/-}$  cells expressing empty lentiviral vector or vector encoding Flag-MNDA. Cells were treated with IFN $\alpha$  (1000 U/ml) for the indicated times. Data are presented as mean  $\pm$  SEM of three independent experiments, each done with technical duplicates.
